# Supplementary material for: Amylose-wrapped luminescent conjugated polymers
Source: Royal Society of Chemistry journal article supplement (doi:10.1039/b803335h), 2008-01-01
Supplement: b803335h.pdf [file b803335h.pdf]

## Electronic Supplementary Information

# Amylose-wrapped luminescent conjugated polymers

Michael J. Frampton, Timothy D. W. Claridge, Gianluca Latini, Sergio Brovelli,  
Franco Cacialli\* and Harry L. Anderson\*

Department of Chemistry, Chemistry Research Laboratory, University  
12 Mansfield Road, Oxford, OX1 3TA (UK)  
harry.anderson@chem.ox.ac.uk

and

Department of Physics and Astronomy and London Centre for Nanotechnology,  
University College London, Gower Street, London, WC1E 6BT (UK).  
f.cacialli@ucl.ac.uk

## Contents

|                                                            |   |
|------------------------------------------------------------|---|
| 1. Details of NMR assignments                              | 1 |
| 2. UV-visible and luminescence titrations                  | 2 |
| 3. Thin-film photoluminescence data                        | 3 |
| 4. Preparation of complexes for thin-film characterisation | 4 |

## 1. Details of NMR assignments

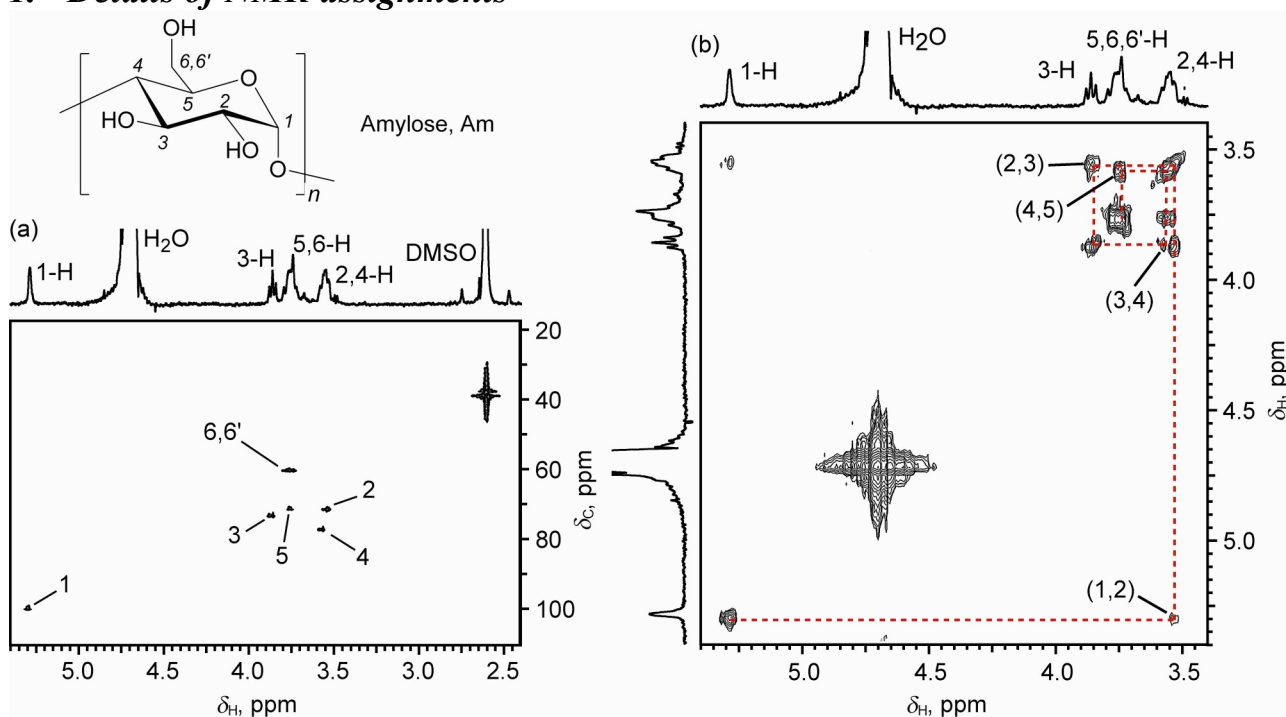

**Figure 1** (a)  $^1\text{H}$ - $^{13}\text{C}$  HSQC and (b)  $^1\text{H}$ - $^1\text{H}$  COSY NMR spectra of amylose (MW = 15,000; TCI Europe) in 1:4 DMSO/water showing assignments for the amylose C-H protons (500 MHz, 298 K).

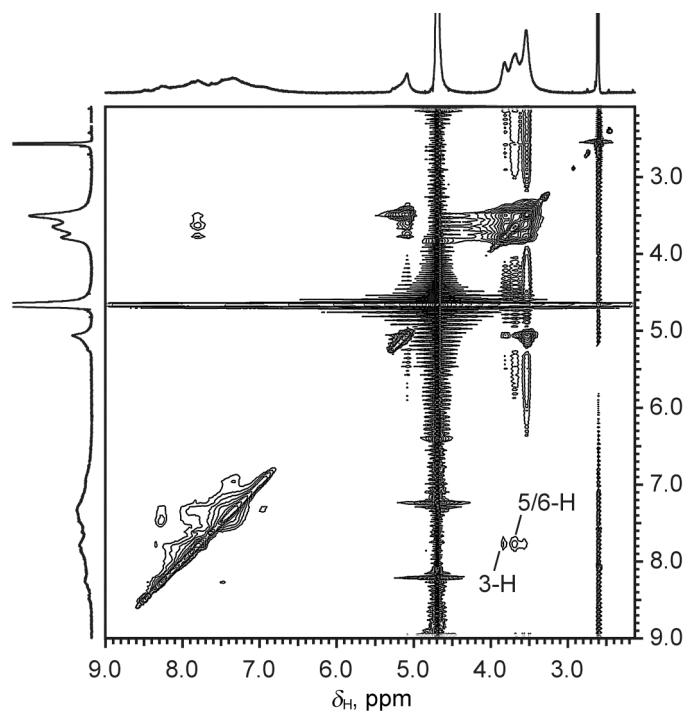

**Figure 2**  $^1\text{H}$  NOESY NMR spectrum of a 1:1 PDVCAm complex in 1:4 DMSO/water solution (500 MHz, 289 K).

## 2. UV-visible and luminescence titrations

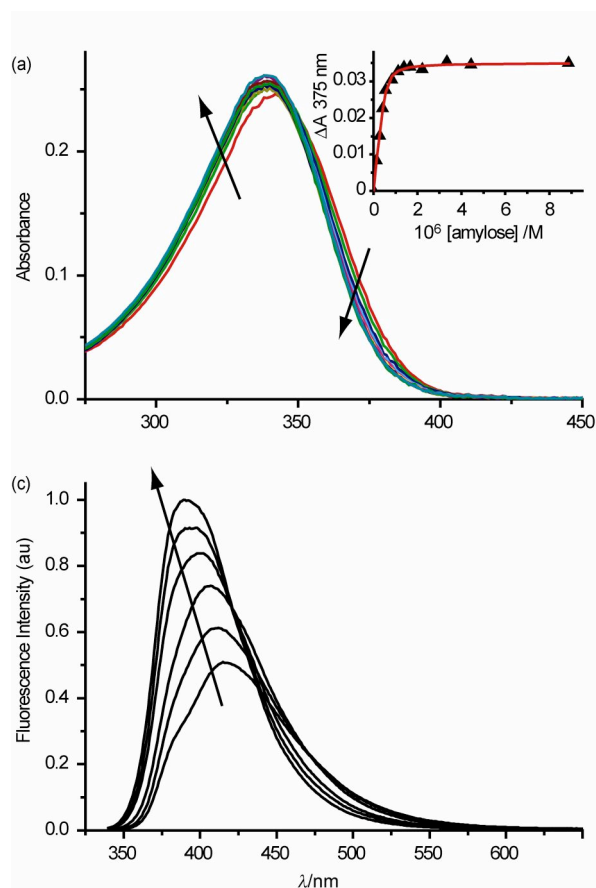

**Figure 3** (a) Effect of increasing amylose concentration on the UV-visible spectrum of PPP in 20 % DMSO aqueous solution. The inset shows the data fitted to a simple 1:1 binding isotherm with  $K = 2.4 (\pm 0.6) \times 10^7 \text{ M}^{-1}$  and  $[\text{PPP}] = 5.4 \times 10^{-7} \text{ M}$ . (b) Effect of increasing amylose concentration on the fluorescence spectrum of PPP in 10 % DMSO aqueous solution ( $\lambda_{\text{ex}} = 330 \text{ nm}$ ).

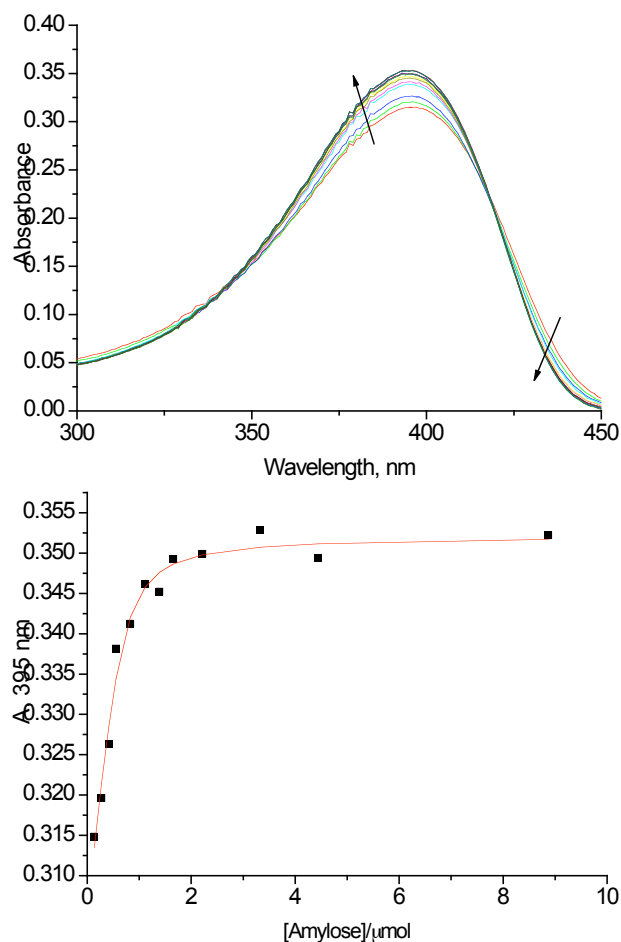

**Figure 4** Effect of increasing amylose concentration on the UV-visible spectrum of PDV-β-CD in 20 % DMSO aqueous solution. The inset shows the data fitted to a simple 1:1 binding isotherm with  $K = 1.2 (\pm 0.7) \times 10^7 \text{ M}^{-1}$  and  $[\text{PDV-}\beta\text{-CD}] = 6.6 \times 10^{-7} \text{ M}$ .

### 3. Thin-film photoluminescence data

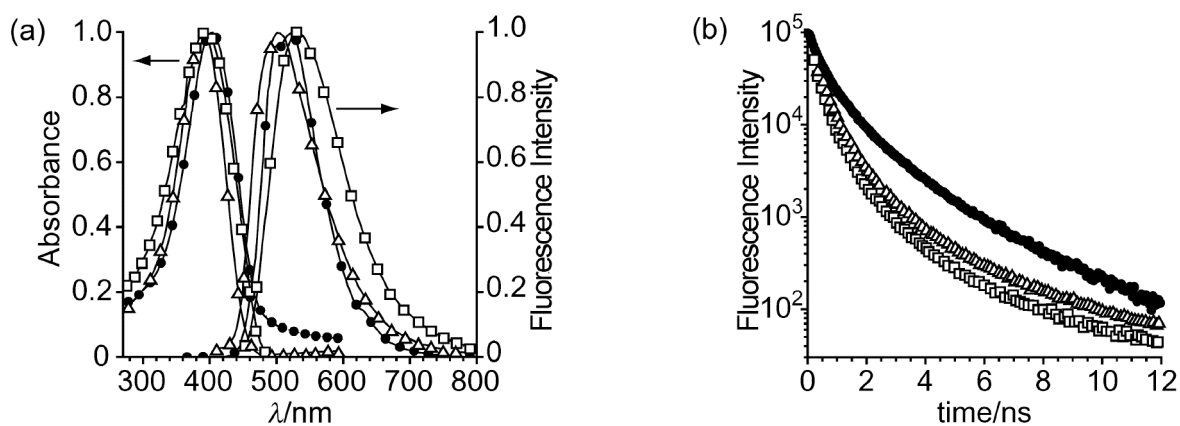

**Figure 5** (a) Normalised thin-film UV-visible absorption and photoluminescence spectra (b) photoluminescence time decay of PDV (□), PDV-β-CD (●) and PDV-β-CD (△).

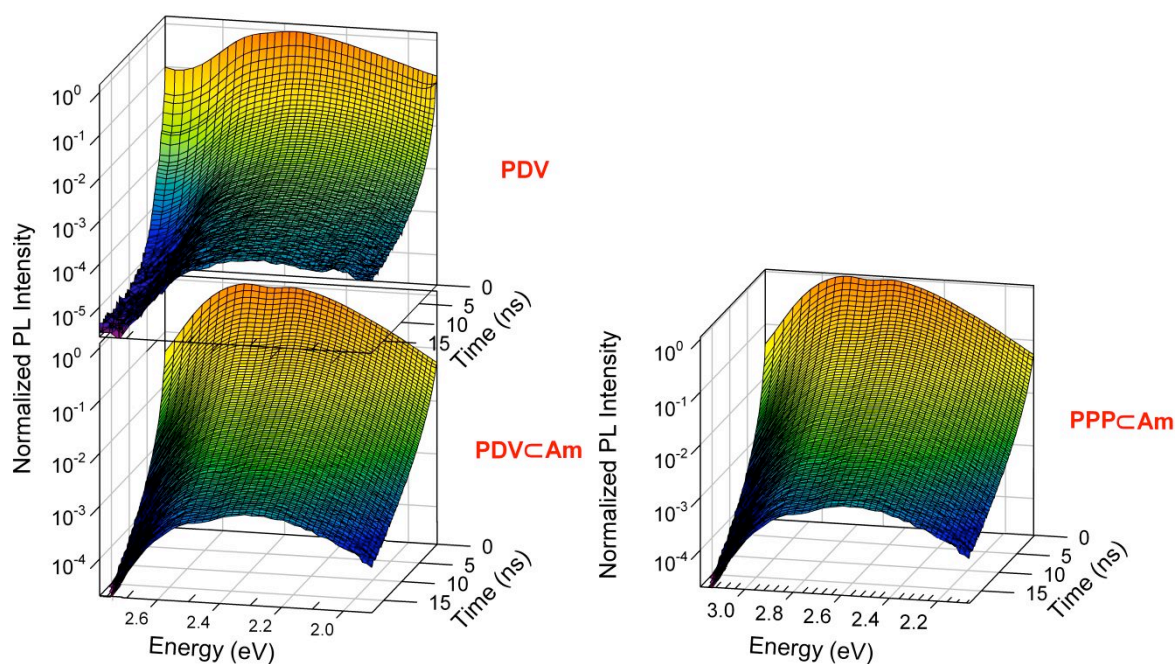

**Figure 6** Time-resolved luminescence spectra for PDV, PDVCAm and PPPCAm.

#### 4. Preparation of complexes for thin-film characterisation

**PDVCAm:** A solution of amylose (120 mg, MW = 15,000, TCI Europe) in DMSO (3 cm<sup>3</sup>) was added to a solution of PDV (60 mg) in DMSO (3 cm<sup>3</sup>). The solution was stirred for 5 min, then diluted with water (36 cm<sup>3</sup>). The solution was dialysed against pure water (12,000 MWCO cellulose seamless membrane) to remove DMSO, replacing the water three times at daily intervals. The solution was concentrated to a concentration of 15 mg cm<sup>-3</sup> by stirring under vacuum at 50 °C and filtered through a 0.45 µm nylon filter.

**PPPCA**m: A solution of amylose (120 mg, MW = 15,000, TCI Europe) in DMSO was added to a solution of PPP (60 mg) in water/DMSO 1:2 (9 cm<sup>3</sup>). The solution was stirred for 10 min then diluted with water (100 cm<sup>3</sup>). The solution was dialysed against pure water (12,000 MWCO cellulose seamless membrane) to remove DMSO, replacing the water three times at daily intervals. The solution was concentrated to a concentration of 15 mg cm<sup>-3</sup> by stirring under vacuum at 50 °C and filtered through a 0.45 µm nylon filter.
